# Supplementary material
Source: HighWire-hosted journal article supplement (http://thorax.bmjjournals.com/highwire/filestream/174071/field_highwire_adjunct_files/3/633251webonlyapp4.pdf)

Figure E3

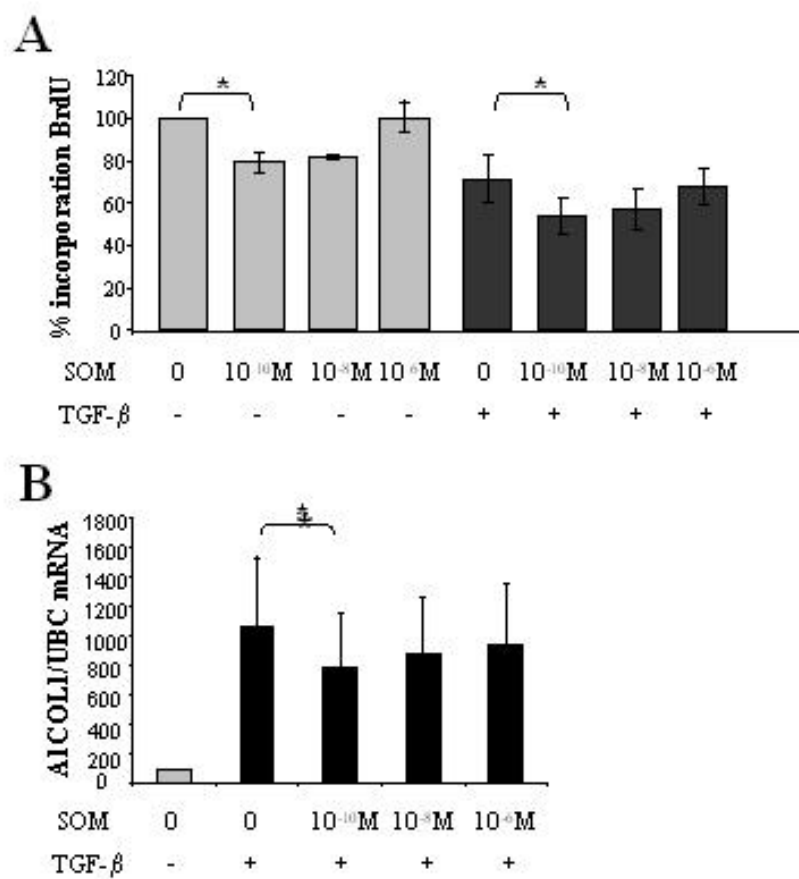

Supplement: 633251webonlyapp4.pdf [file 633251webonlyapp4.pdf]
